# Supplementary material
Source: Springer Nature journal article supplement (https://www.springermedizin.de/resource/supplementary/12891_2007_367_MOESM9_ESM.pdf/9511164)

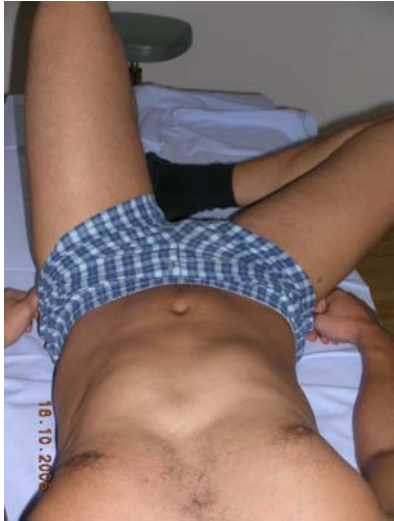

A

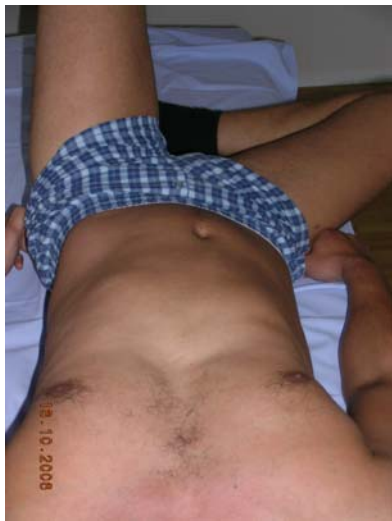

B

Supplement: MOESM9 [file 9511164]
